# Supplementary material for: Novel Thin Film Nanocomposite Forward Osmosis Membranes Prepared by Organic Phase Controlled Interfacial Polymerization with Functional Multi-Walled Carbon Nanotubes
Source: MDPI journal article supplement (doi:10.3390/membranes11070476), 2021-06-28
Supplement: s1 [file s1]

*Supporting Information*

# **Novel thin film nanocomposite forward osmosis membranes prepared by organic phase controlled interfacial polymerization with functional multi-walled carbon nanotubes**

**Xu Zhang <sup>1,§</sup>, Jiuhan Zheng <sup>1,§</sup>, Lusheng Xu <sup>1</sup>, Ming Yin <sup>1</sup>, Guoliang Zhang <sup>1,\*</sup>, Wenqian Zhao <sup>1</sup>, Zeyu Zhang <sup>1</sup>, Chong Shen <sup>2</sup>, Qin Meng <sup>2,\*\*</sup>**

<sup>1</sup> Center for Membrane and Water Science & Technology, Institute of Oceanic and Environmental Chemical Engineering, State Key Lab of Green Chemical Synthesis Technology, Zhejiang University of Technology, Hangzhou 310014, P.R.China

<sup>2</sup> College of Chemical and Biological Engineering, State Key Laboratory of Chemical Engineering, Zhejiang University, Zhejiang University, Hangzhou 310027, P.R.China

\* Correspondence: guoliangz@zjut.edu.cn; Tel.: +86-571-88320863 (G.Z.); mengq@zju.edu.cn; Tel.: +86-571-87951227 (Q.M.)

\* These authors contributed equally.

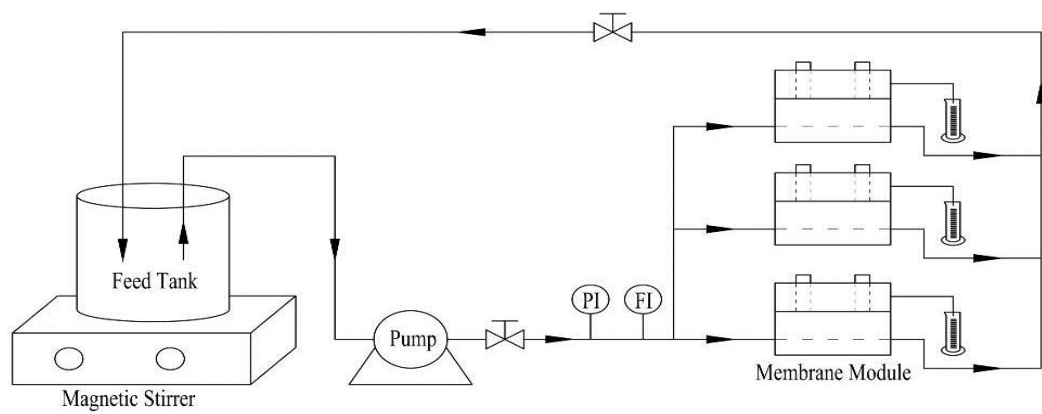

**Figure S1. Schematic diagram of cross-flow RO system.**

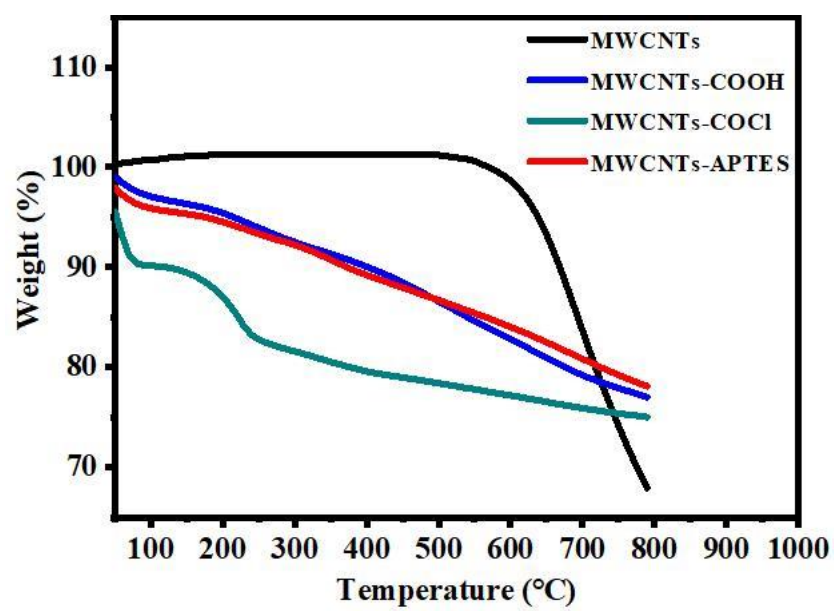

Figure S2. TGA curves of MWCNTs, MWCNTs-COOH, MWCNTs-COCl and MWCNTs-APTES.

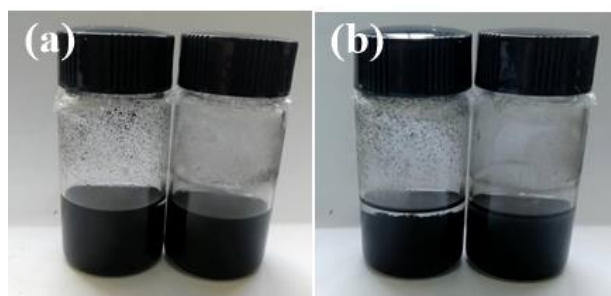

**Figure S3.** Optical photographs of MWCNTs and MWCNTs-APTES dispersion after keeping static for **(a)** 0 second and **(b)** 10 min. (left: MWCNTs, right: MWCNTs-APTES).

**Table S1.** Performance of TFN membrane compared with other CNTs-based FO membranes using DI water as feed solution.

| Membrane                     | Draw<br>solution | Membrane<br>Orientation | $J_w$ (LMH) | $J_s$ (gMH) | $J_s/J_w$ (g/L) | Ref  |
|------------------------------|------------------|-------------------------|-------------|-------------|-----------------|------|
| TFN-aCN/AP                   | 1 M NaCl         | AL-FS                   | 46.0        | 1.2         | 0.026           | S1   |
| M-T/CNT/PA                   | 1 M NaCl         | AL-DS                   | 28.48       | 7.4         | 0.26            | S2   |
|                              |                  | AL-FS                   | ~18         | ~4.8        | ~0.27           |      |
| PET30-mCNT-HPAN30            | 1 M NaCl         | AL-DS                   | 43.5        | 11.1        | 0.255           | S3   |
|                              |                  | AL-FS                   | 29.0        | 9.4         | 0.32            |      |
| PVDF/SiO <sub>2</sub> @MWNTs | 1 M NaCl         | AL-FS                   | 22.1        | 4.1         | 0.19            | S4   |
| TFC                          |                  |                         |             |             |                 |      |
| TFN/SCNTs                    | 1 M NaCl         | AL-FS                   | 29.9        | ~3.5        | 0.12            | S5   |
| TFC-CNT                      | 2 M NaCl         | AL-DS                   | 31          | 6.2         | 0.2             | S6   |
| TFC MMM                      | 0.6 M NaCl       | ALFS                    | 11.98       | 7.7         | 0.64            | S7   |
| 0.5MWfT/M-P                  | 1 M NaCl         | ALFS                    | 12.7        | 5.8         | 0.46            | S8   |
| Car-PES TFC                  | 2 M NaCl         | AL-DS                   | 25.8        | 12.3        | 0.476           | S9   |
|                              |                  | AL-FS                   | 16.1        | 8.0         | 0.496           |      |
| TFN                          | 1 M NaCl         | ALDS                    | 22.2        | 2.6         | 0.117           | This |
|                              |                  | AL-FS                   | 19.6        | 1.7         | 0.091           | work |

## Supplementary References

- S1. Wang, D.; Li, J.; Gao, B.; Chen, Y.; Wang, Z. Triple-layered thin film nanocomposite membrane toward enhanced forward osmosis performance. *J. Membr. Sci.* **2021**, *620*, 118879.
- S2. Zhang, M.M.; Jin, W.B.; Yang, F.L.; Duke, M.; Dong, Y.C.; Tang, C.Y.Y. Engineering a Nanocomposite Interlayer for a Novel Ceramic-Based Forward Osmosis Membrane with Enhanced Performance. *Environ. Sci. Technol.* **2020**, *54*, 7715-7724.
- S3. Tsai, M.T.; Chung, L.H.; Lin, G.Y.; Chang, M.C.; Lee, C.Y.; Tai, N.H. Layered carbon nanotube/polyacrylonitrile thin-film composite membrane for forward osmosis application. *Sep. Purif. Technol.* **2020**, *241*, 116683.
- S4. Zhang, X.; Shen, L.; Guan, C.Y.; Liu, C.X.; Lang, W.Z.; Wang, Y. Construction of SiO<sub>2</sub>@MWNTs incorporated PVDF substrate for reducing internal concentration polarization in forward osmosis. *J. Membr. Sci.* **2018**, *564*, 328-341.
- S5. Li, Y.H.; Zhao, Y.T.; Tian, E.L.; Ren, Y.W. Preparation and characterization of novel forward osmosis membrane incorporated with sulfonated carbon nanotubes. *Rsc Advances* **2018**, *8*, 41032-41039.
- S6. Zhao, X.Z.; Li, J.; Liu, C.K. A novel TFC-type FO membrane with inserted sublayer of carbon nanotube networks exhibiting the improved separation performance. *Desalination* **2017**, *413*, 176-183.
- S7. Choi, H.G.; Son, M.; Choi, H. Integrating seawater desalination and wastewater reclamation forward osmosis process using thin-film composite mixed matrix membrane with functionalized carbon nanotube blended polyethersulfone support layer. *Chemosphere* **2017**, *185*, 1181-1188.
- S8. Morales-Torres, S.; Esteves, C.M.P.; Figueiredo, J.L.; Silva, A.M.T. Thin-film composite forward osmosis membranes based on polysulfone supports blended with nanostructured carbon materials. *J. Membr. Sci.* **2016**, *520*, 326-336.
- S9. Liu, Q.; Qiu, G.L.; Zhou, Z.Z.; Li, J.G.; Amy, G.L.; Xie, J.P.; Lee, J.Y. An Effective Design of Electrically Conducting Thin-Film Composite (TFC) Membranes for Bio and Organic Fouling Control in Forward Osmosis (FO). *Environ. Sci. Technol.* **2016**, *50*, 10596-10605.
